# Supplementary material
Source: MDPI journal article supplement (https://www.mdpi.com/2297-8739/7/4/72)

Supplementary Material

# Determination of carminic acid in foodstuffs and pharmaceuticals by microchip electrophoresis with photometric detection

Marián Masár <sup>1\*</sup>, Jasna Hradski <sup>1</sup>, Eva Vargová <sup>1</sup>, Adriána Miškovčíková <sup>1</sup>, Peter Božek <sup>1</sup>, Juraj Ševčík <sup>2</sup> and Roman Szucs <sup>1</sup>

<sup>1</sup> Department of Analytical Chemistry, Faculty of Natural Sciences, Comenius University in Bratislava, Mlynská dolina CH2, Ilkovičova 6, Bratislava, 84215, Slovakia; marian.masar@uniba.sk (M.M.), vargova.eva01@gmail.com (E.V.), miskovcikov2@uniba.sk (A.M.), hradski1@uniba.sk (J.H.) peter.bozek@uniba.sk (P.B.), roman.szucs@uniba.sk (R.S.)

<sup>2</sup> Department of Analytical Chemistry, Faculty of Science, Palacký University Olomouc, 17. listopadu 12, Olomouc, 77900, Czech Republic; juraj.sevcik@upol.cz

\* Correspondence: marian.masar@uniba.sk; Tel.: +421-2-9014-9344

## Contents

The added supplementary material comprises of two figures and one table:

- **Table S1.** Some parameters of analytical methods used for determination of carminic acid
- **Figure S1.** Structure of carminic acid with pKa values.
- **Figure S2.** Linear dynamic range for: (a) peak height; and (b) peak area of carminic acid
- **Figure S3.** Plot of residuals of peak area

**Table S1.** Some parameters of analytical methods used for determination of carminic acid.

| Method                            | Sample                                               | Sample pretreatment                                                                                                                                                                                                            | LOD<br>( $\mu\text{mol L}^{-1}$ ) | Ref.      |
|-----------------------------------|------------------------------------------------------|--------------------------------------------------------------------------------------------------------------------------------------------------------------------------------------------------------------------------------|-----------------------------------|-----------|
| Spectrophotometry                 | confectionery, beverages                             | dissolved in water, filtered (0.45 $\mu\text{m}$ pore size), CPE (Triton X-100)                                                                                                                                                | 0.024 <sup>1</sup>                | [1]       |
| Square-wave stripping voltammetry | beverages, ice cream                                 | spiked carbonated beverages – mixed with acetate buffer, deoxygenated; ice cream – mixed with warm water                                                                                                                       | 0.001 <sup>1</sup>                | [2]       |
| Differential pulse polarography   | confectionery, fruit flavored milk drinks            | confectionery – diluted in B-R buffer; milk drinks – diluted in acetonitrile, centrifugated, diluted in B-R buffer                                                                                                             | 0.16                              | [3]       |
| HPLC-UV-Vis                       | vitamins                                             | dissolved in hot water, centrifuged, filtered (0.40 $\mu\text{m}$ pore size)                                                                                                                                                   | 4.9 <sup>1</sup>                  | [4]       |
| HPLC-UV-Vis                       | 16 different food types                              | ground, LLE (0.05 mol L <sup>-1</sup> NaOH), centrifuged, filtered (0.45 $\mu\text{m}$ pore size)                                                                                                                              | 0.8 <sup>1</sup>                  | [5]       |
| HPLC-UV-Vis                       | saffron                                              | aqueous extracts prepared according to the ISO 3632-2, filtered (0.45 $\mu\text{m}$ pore size)                                                                                                                                 | 0.06                              | [6]       |
| HPLC-UV-Vis                       | beverages, milk products                             | beverages – filtered (0.45 $\mu\text{m}$ pore size); high lipid samples – LLE (water/hexane); high protein samples – stirred with NH <sub>4</sub> OH, adjusted to pH 2, centrifuged, filtered (0.45 $\mu\text{m}$ pore size)   | 2.0                               | [7]       |
| HPLC-FD                           |                                                      |                                                                                                                                                                                                                                | 3.0                               |           |
| HPLC-MS/MS                        | beverages                                            | carbonated beverages – degassed; alcoholic beverages – evaporation of ethanol, adjusted to pH 3.0-3.5, SPE (HLB cartridge), filtered (0.22 $\mu\text{m}$ pore size)                                                            | 0.006                             | [8]       |
| CE-UV-Vis                         | confectionery, beverages, fruit flavored milk drinks | confectionery – blended with ethanol, decanted; carbonated beverages – degassed; milk drinks – diluted with ethanol, adjusted to pH 2.0, centrifuged; SPE (PA column), LVSS                                                    | 0.053                             | [9]       |
| CE-UV-Vis                         | beverages, ice lollies, syrups                       | beverages, ice lollies – diluted with water; syrups – diluted with water, filtered                                                                                                                                             | 4.3                               | [10]      |
| CE-UV-Vis                         | fruit flavored milk drinks                           | diluted with ethanol, adjusted to pH 2.0, centrifuged, SPE (PA column)                                                                                                                                                         | $\leq 0.81$                       | [11]      |
| CE-UV-Vis                         | beverages                                            | filtered (0.45 $\mu\text{m}$ pore size), diluted with water, adjusted to pH 2.5, dSPME with dASNP                                                                                                                              | 0.12                              | [12]      |
| MEEKC-UV-Vis                      | beverages, ice lollies                               | beverages – degassed; ice lollies – melted; SPE (PA column) only for CE                                                                                                                                                        | 3.7                               | [13]      |
| CE-UV-Vis                         |                                                      |                                                                                                                                                                                                                                | 1.2                               |           |
| MCE-PD                            | candies, pharmaceuticals, radler, saffron            | candies, pharmaceuticals – dissolved in water, filtered (0.45 $\mu\text{m}$ pore size); radler – degassed; saffron – ground, suspended in water, sonicated, filtered (0.45 $\mu\text{m}$ pore size); adjusted to pH of the BGE | 0.069                             | this work |

BGE – background electrolyte; B-R buffer – Britton-Robinson buffer; CE – capillary electrophoresis; CPE – cloud point extraction; dASNP – diamino moiety functionalized silica nanoparticles; dSPME – dispersive solid-phase microextraction; FD – fluorescence detection; HLB – hydrophilic-lipophilic balance; HPLC – high performance liquid chromatography; LLE – liquid-liquid extraction; LVSS – large-volume sample stacking; MCE – microchip electrophoresis; MEEKC – microemulsion electrokinetic chromatography; MS/MS – tandem mass spectrometry; PA – polyamide; PD – photometric detection; SPE – solid-phase extraction; UV-Vis – Ultraviolet-visible

<sup>1</sup> expressed for carmines

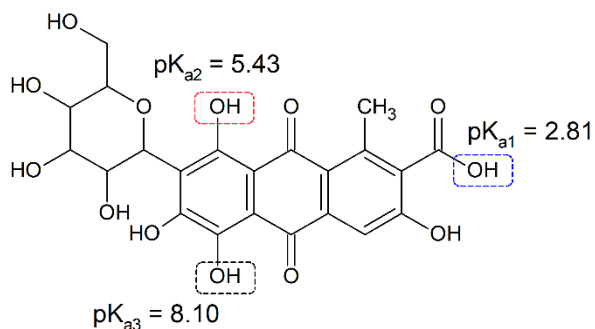

**Figure S1.** Structure of carminic acid with  $pK_a$  values. The  $pK_{a1}$  belongs to the carboxyl group (blue dashed frame) which has the most acidic hydrogen in molecule of carminic acid. The second most acidic hydrogen comes from the hydroxyl group (red dashed frame) with the  $pK_a$  value of 5.43. The other hydroxyl group (black dashed frame) is also able to lose acidic hydrogen but it is the weakest acidic group in the molecule with  $pK_{a3}$  of 8.1.

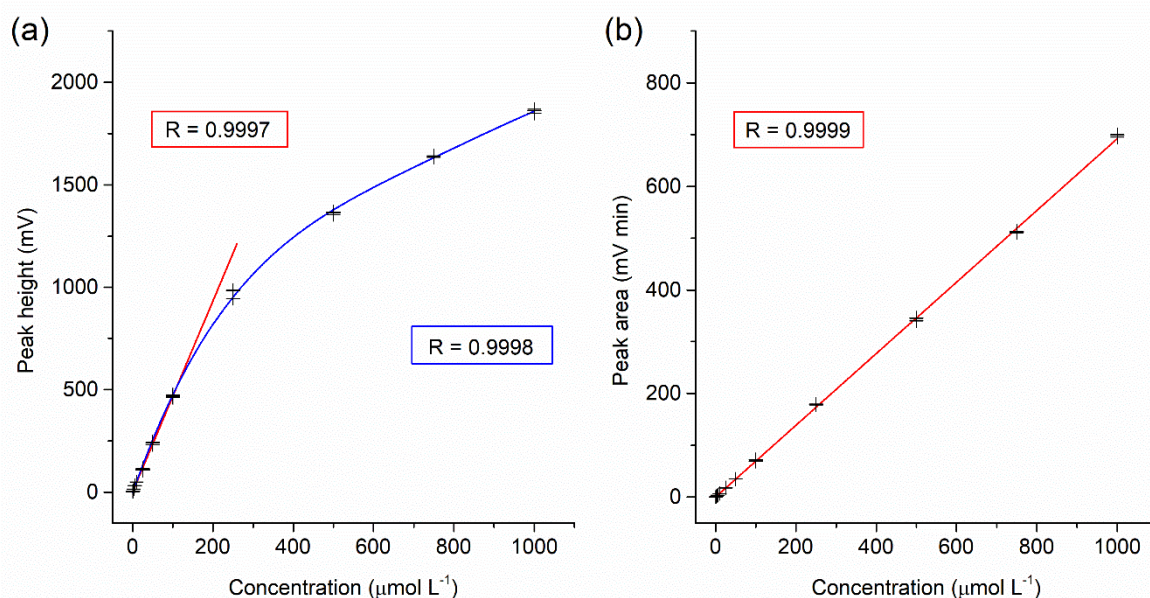

**Figure S2.** Linear dynamic range for: (a) peak height; and (b) peak area of carminic acid.

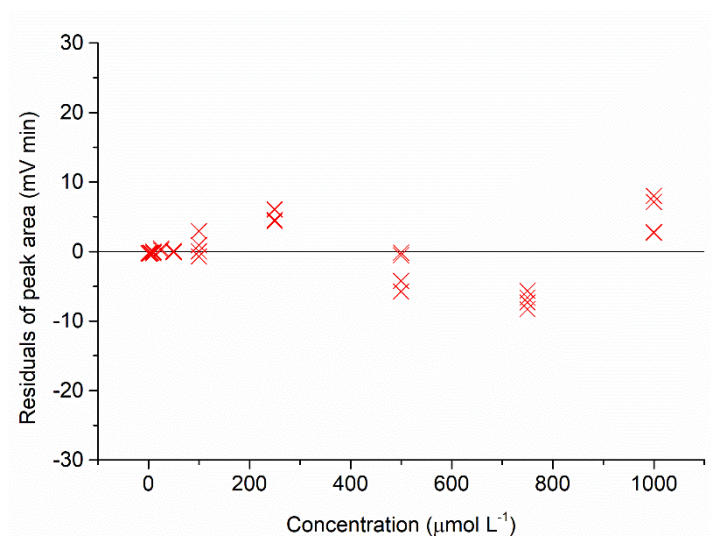

**Figure S3.** Plot of residuals of peak area.

## References

- Heydari, R.; Hosseini, M.; Zarabi, S. A simple method for determination of carmine in food samples based on cloud point extraction and spectrophotometric detection. *Spectrochim. Acta A Mol. Biomol. Spectrosc.*, **2015**, *150*, 786-791, doi:10.1016/j.saa.2015.06.032.
- Alghamdi, A.H.; Alshammery, H.M.; Abdalla, M.A.; Alghamdi, A.F. Determination of carmine food dye (E120) in foodstuffs by stripping voltammetry. *J. AOAC Int.*, **2009**, *92*, 1454-1459, doi:10.1093/jaoac/92.5.1454.
- Yilmaz, U.T.; Ergun, F.; Yilmaz, H. Determination of the food dye carmine in milk and candy products by differential pulse polarography. *J. Food Drug Anal.*, **2014**, *22*, 329-335, doi:10.1016/j.jfda.2013.12.002.
- Šuleková, M.; Hudák, A.; Smřcová, M. The determination of food dyes in vitamins by RP-HPLC. *Molecules*, **2016**, *21*, doi:10.3390/molecules21101368.
- Lim, H.S.; Choi, J.C.; Song, S.B.; Kim, M. Quantitative determination of carmine in foods by high-performance liquid chromatography. *Food Chem.*, **2014**, *158*, 521-526, doi:10.1016/j.foodchem.2014.02.122.
- Ordoudi, S.A.; Staikidou, C.; Kyriakoudi, A.; Tsimidou, M.Z. A stepwise approach for the detection of carminic acid in saffron with regard to religious food certification. *Food Chem.*, **2018**, *267*, 410-419, doi:10.1016/j.foodchem.2017.04.096.
- Carvalho, P.R.N.; Collins, C.H. HPLC determination of carminic acid in foodstuffs and beverages using diode array and fluorescence detection. *Chromatographia*, **1997**, *45*, 63-66, doi:10.1007/BF02505539.
- Feng, F.; Zhao, Y.; Yong, W.; Sun, L.; Jiang, G.; Chu, X. Highly sensitive and accurate screening of 40 dyes in soft drinks by liquid chromatography-electrospray tandem mass spectrometry. *J. Chromatogr. B Anal. Technol. Biomed. Life Sci.*, **2011**, *879*, 1813-1818, doi:10.1016/j.jchromb.2011.04.014.
- Huang, H.Y.; Chiu, C.W.; Sue, S.L.; Cheng, C.F. Analysis of food colorants by capillary electrophoresis with large-volume sample stacking. *J. Chromatogr. A*, **2003**, *995*, 29-36, doi:10.1016/s0021-9673(03)00530-2.
- Nevado, J.J.B.; Cabanillas, C.G.; Salcedo, A.M.C. Method development and validation for the simultaneous determination of dyes in foodstuffs by capillary zone electrophoresis. *Anal. Chim. Acta*, **1999**, *378*, 63-71, doi:10.1016/S0003-2670(98)00574-1.
- Huang, H.Y.; Shih, Y.C.; Chen, Y.C. Determining eight colorants in milk beverages by capillary electrophoresis. *J. Chromatogr. A*, **2002**, *959*, 317-325, doi:10.1016/s0021-9673(02)00441-7.
- Liu, F.-J.; Liu, C.-T.; Li, W.; Tang, A.-N. Dispersive solid-phase microextraction and capillary electrophoresis separation of food colorants in beverages using diamino moiety functionalized silica nanoparticles as both extractant and pseudostationary phase. *Talanta*, **2015**, *132*, 366-372, doi:10.1016/j.talanta.2014.09.014.
- Huang, H.Y.; Chuang, C.L.; Chiu, C.W.; Chung, M.C. Determination of food colorants by microemulsion electrokinetic chromatography. *Electrophoresis*, **2005**, *26*, 867-877, doi:10.1002/elps.200410279.

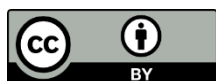

Supplement: s1 [file s1]
